# Supplementary material for: Adaptation of a Bacterial Bioluminescent Assay to Monitor Bioeffects of Gold Nanoparticles
Source: MDPI journal article supplement (doi:10.3390/bioengineering9020061), 2022-02-03
Supplement: s1 [file s1]

# Adaptation of a Bacterial Bioluminescent Assay to Monitor Bioeffects of Gold Nanoparticles

Moustafa R. Yehia <sup>1,\*</sup>, Tatyana E. Smolyarova <sup>2</sup>, Alexandr V. Shabanov <sup>2</sup>, Ekaterina S. Sushko <sup>2,3</sup>, Gennady A. Badun <sup>4</sup> and Nadezhda S. Kudryasheva <sup>1,3</sup>

<sup>1</sup> Biophysics Department, Siberian Federal University, 660041 Krasnoyarsk, Russia; n-qdr@yandex.ru

<sup>2</sup> Institute of Physics SB RAS, Federal Research Center 'Krasnoyarsk Science Center SB RAS', 660036 Krasnoyarsk, Russia; smol.nano@yandex.ru (T.E.S.); alexch\_syb@mail.ru (A.V.S.); kkoval@yandex.ru (E.S.S)

<sup>3</sup> Institute of Biophysics SB RAS, Federal Research Center 'Krasnoyarsk Science Center SB RAS', 660036 Krasnoyarsk, Russia

<sup>4</sup> Department of Chemistry, Moscow State University, 119991 Moscow, Russia; badunga@yandex.ru

\* Correspondence: moustafa.yehia@city.ac.uk

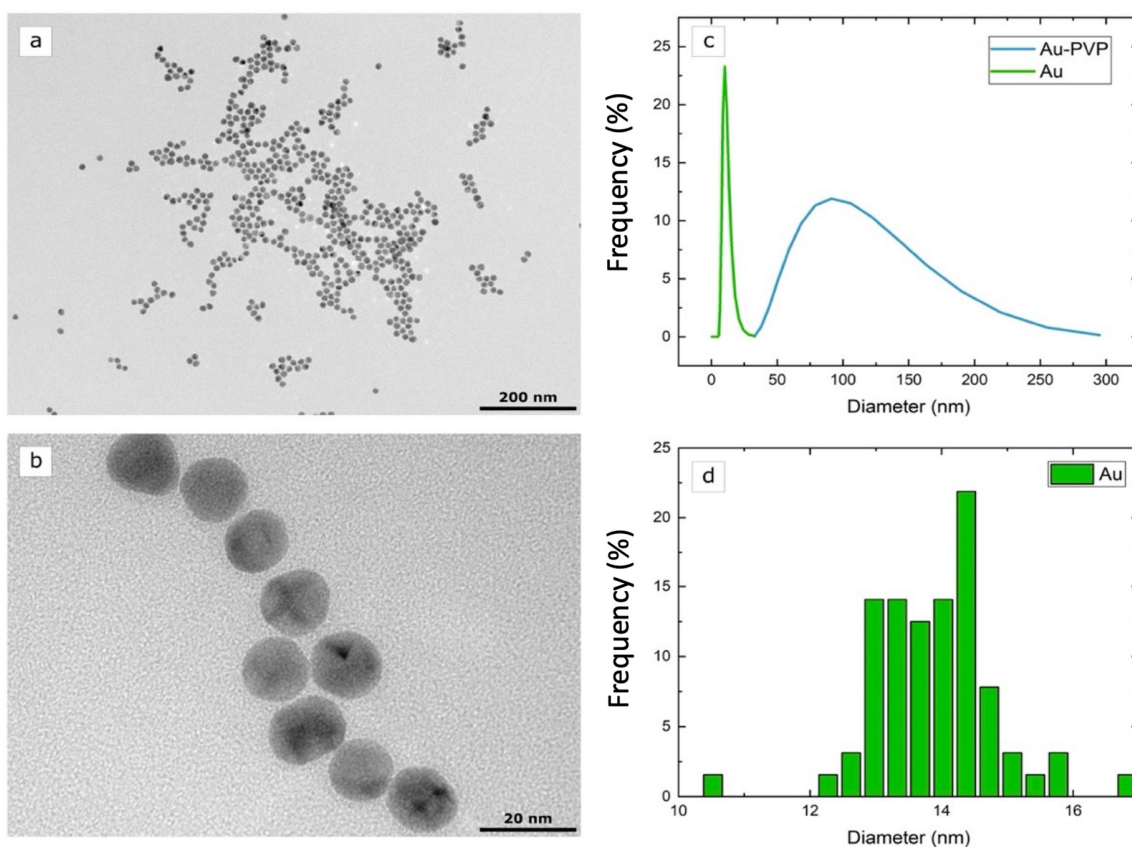

**Figure S1.** Characterization of AuNPs by transmission electron microscopy (TEM) and dynamic light scattering (DLS). (a,b) TEM-images of the prepared Au nanoparticles and size distributions according to (c) TEM particle analysis and (d) Zetasizer analysis.

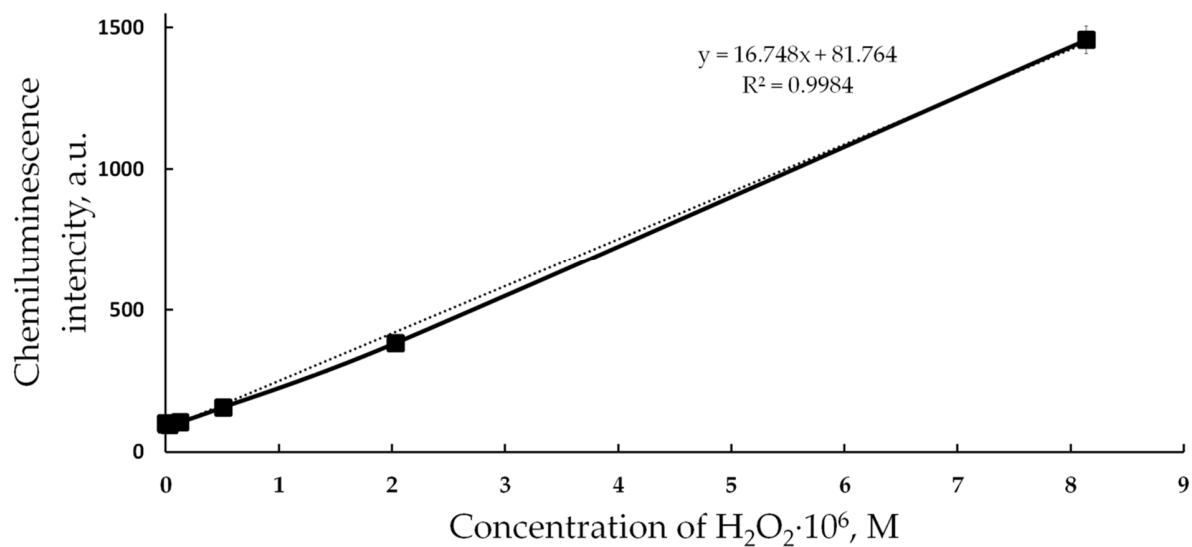

**Figure S2.** Calibration curve for chemiluminescence luminol method for ROS evaluation. Dependence of chemiluminescence intensity on concentration of  $\text{H}_2\text{O}_2$ . Dotted line: linear regression function. Solid line: experimental values.

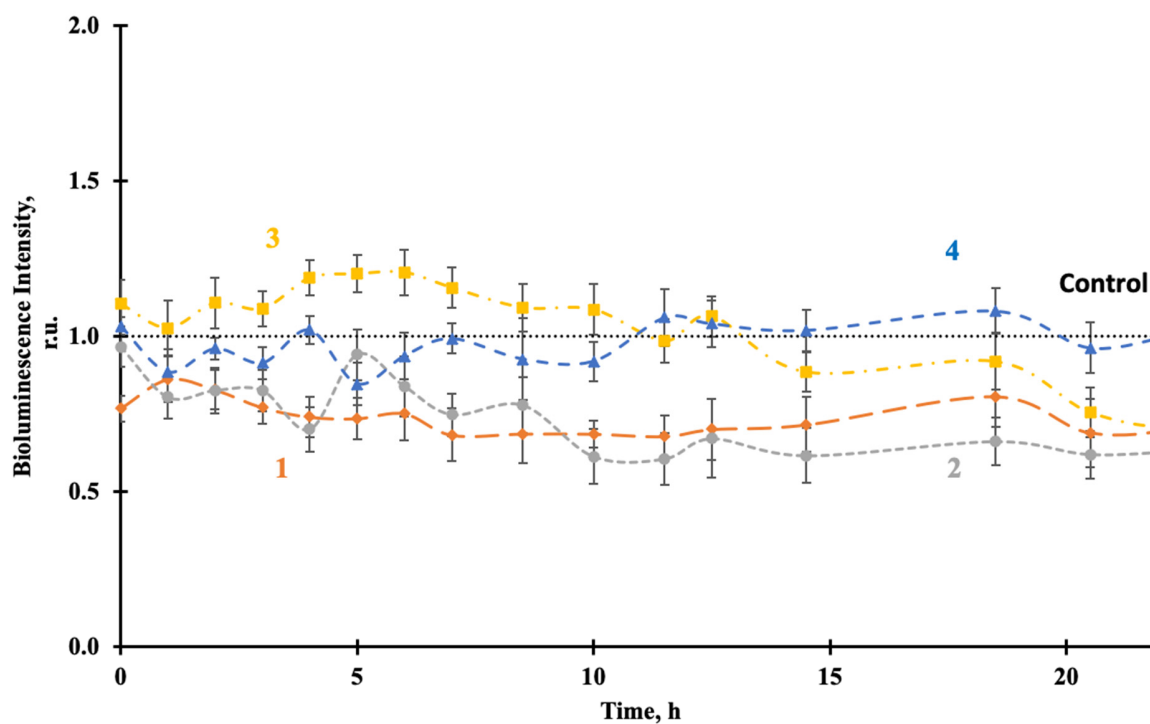

**Figure S3.** Bioluminescence kinetics of bacteria sampled at exponential phase of growth (17 h) in the presence of AuNPs. Concentrations of AuNPs were: (1)  $10^{-3}$ , (2)  $10^{-4}$ , (3)  $10^{-5}$ , (4)  $10^{-6}$  g/L.
